# Supplementary material
Source: publisher figshare collection journal article supplement (https://acs.figshare.com/ndownloader/files/11109401)
Supplement: Supplementary file 1 [file 11109401]

Supporting Information for

**Polydopamine Induced In-situ Formation of Metallic Nanoparticles in Confined  
Microchannels of Porous Membrane as Flexible Catalytic Reactor**

Zhen Zeng<sup>a</sup>, Mingfen Wen<sup>a</sup>, Boxuan Yu<sup>a</sup>, Gang Ye<sup>a,b,\*</sup>, Xiaomei Huo<sup>a</sup>, Yuexiang Lu<sup>a,b</sup>, Jing Chen<sup>a,b,\*</sup>

<sup>a</sup> *Collaborative Innovation Center of Advanced Nuclear Energy Technology, Institute of Nuclear and New Energy  
Technology, Tsinghua University, Beijing, 100084, China*

<sup>b</sup> *Beijing Key Lab of Radioactive Waste Treatment, Tsinghua University, Beijing 100084, China*

Corresponding Authors, E-mail: yegang@mail.tsinghua.edu.cn; jingxia@tsinghua.edu.cn

## Supporting Figures

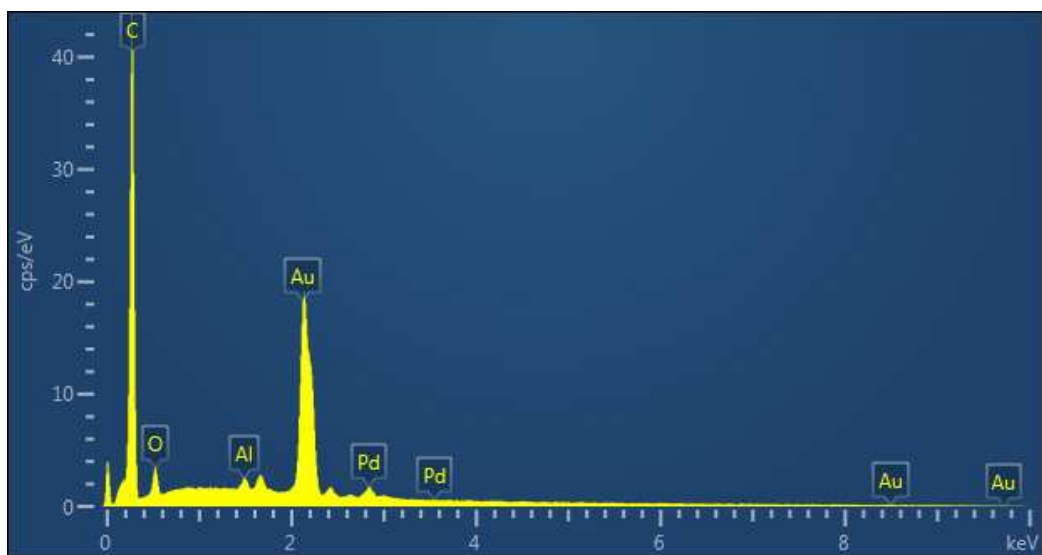

**Figure S1.** EDX spectrum of PDA modified NTEM after immobilization of Pd NPs

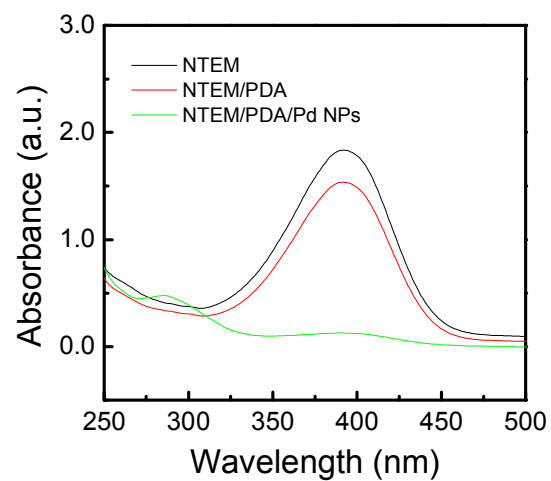

**Figure S2.** Catalytic reduction of 4-NP by native NTEM membrane, PDA deposited NTEM, and Pd NPs immobilized NTEM.

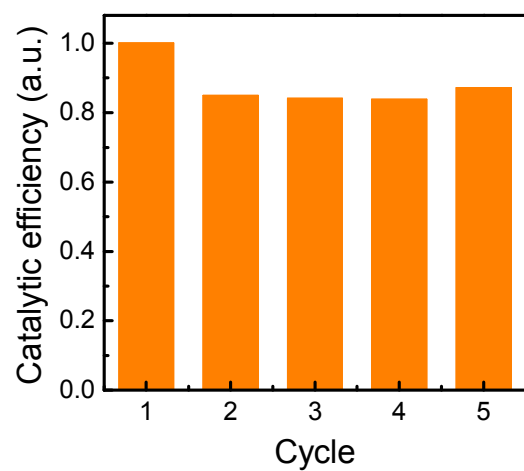

**Figure S3.** Reusability of the Pd NPs immobilized NTEM for catalytic reduction of 4-NP.

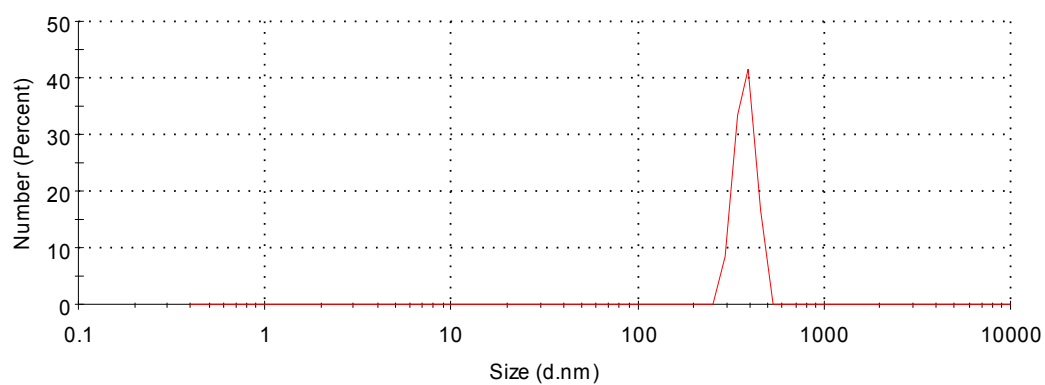

**Figure S4.** Dynamic light scattering (DLS) measurement of the filtrate in the first run catalytic reduction of 4-NP by the functionalized membrane.

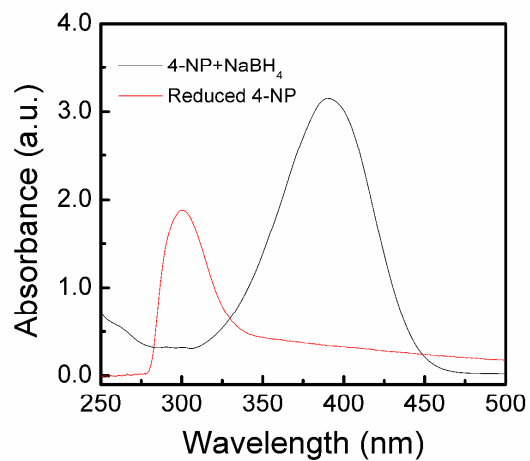

**Figure S5.** UV-vis absorption spectra of reaction mixture of 4-NP and NaBH<sub>4</sub> (black line) and the reduced product (red line) catalyzed by isolated PDA/Pd hybrid nanotubes.
